# Supplementary material
Source: publisher site journal article supplement (https://www.dovepress.com/article/212433)
Supplement: Supplementary file 1 [file get_supplementary_file.php]

**Supplementary materials**

**Table S1: Clinical Baseline Information**

**DEMOGRAPHIC DETAILS**

|                                      |                                                                                                                  |
|--------------------------------------|------------------------------------------------------------------------------------------------------------------|
| ID (code)                            |                                                                                                                  |
| Hospital name                        |                                                                                                                  |
| Hospital ID of patient               |                                                                                                                  |
| Date of blood collection             |                                                                                                                  |
| Mobile no.                           |                                                                                                                  |
| Date of birth                        |                                                                                                                  |
| Place of birth                       |                                                                                                                  |
| Gender                               | 0. Male<br>1. Female                                                                                             |
| Age at epilepsy diagnosis            |                                                                                                                  |
| Newly diagnosed                      | 0. No<br>1. Yes<br>If yes which date:                                                                            |
| classification of epileptic seizures | 0. Partial (specify -----)<br>1. generalized (specify-----)                                                      |
| The time of first seizure            |                                                                                                                  |
| Epilepsy Syndromes                   | 0. Idiopathic epilepsies<br>1. Symptomatic epilepsies (define Underlying etiology)<br>2. Cryptogenic epilepsies  |
| Level of education for parents       | 0. Illiterate<br>1. Attended school but did not reach grade 12<br>2. Grade 12<br>3. Undergraduate<br>4. Graduate |
| Income for parents                   | 0. <300JD<br>1. 300-600 JD<br>2. >600-1000 JD<br>3. >1000 JD<br>4. refuse                                        |
| Height (m)                           |                                                                                                                  |
| Weight (Kg)                          |                                                                                                                  |
| Waist circumference                  |                                                                                                                  |

**Table S1: Cont.**

**CLINICAL HISTORY**

|                                                                         |                                                                                                       |
|-------------------------------------------------------------------------|-------------------------------------------------------------------------------------------------------|
| History of febrile seizure                                              | 0. No<br>1. Yes (when...)                                                                             |
| Family history of epilepsy                                              | 2. No<br>3. 1. Yes (specify number and degree of relatives)                                           |
| Non-epilepsy related co morbidity                                       | 0. No<br>1. Yes (DM)<br>2. Yes (HTN)<br>3. Yes (CAD)<br>4. Yes (osteoporosis)<br>5. Yes (others-----) |
| Non-epilepsy medication (prescription & OTC)    0. No            1. Yes |                                                                                                       |
|                                                                         |                                                                                                       |
|                                                                         |                                                                                                       |
|                                                                         |                                                                                                       |
|                                                                         |                                                                                                       |
| Do you suffer from:                                                     |                                                                                                       |
| Heart disease                                                           | 0. No<br>1. Yes                                                                                       |
| High blood pressure                                                     | 0. No<br>1. Yes                                                                                       |
| High cholesterol or triglycerides                                       | 0. No<br>1. Yes                                                                                       |
| Liver or kidney disease                                                 | 0. No<br>1. Yes                                                                                       |
| Glaucoma                                                                | 0. No<br>1. Yes (specify)                                                                             |
| A thyroid disorder;                                                     | 0. No<br>1. Yes                                                                                       |

**Table S1: Cont.**

|                                                                         |                 |
|-------------------------------------------------------------------------|-----------------|
| Lupus                                                                   | 0. No<br>1. Yes |
| Porphyria                                                               | 0. No<br>1. Yes |
| A history of mental illness, psychosis, or suicidal thoughts or actions | 0. No<br>1. Yes |
| Psychosis                                                               | 0. No<br>1. Yes |
| Suicidal thoughts or actions                                            | 0. No<br>1. Yes |

**Lab evaluation**

|                                  |                            |
|----------------------------------|----------------------------|
| MRI (Magnetic resonance imaging) | 0. No<br>1. Yes (date)     |
| EEG (Electroencephalogram)       | 0. No<br>1. Yes (date)     |
| CT (Computerized tomography)     | 0. No<br>1. Yes (date)     |
| Neuropsychological evaluation    | 0. No<br>1. Yes (date)     |
| Vitamin D                        | 0. No<br>1. Yes (date)     |
| Other lab test                   | 0. No<br>1. Yes (specify ) |

**MEDICATION HISTORY**

|                               |                                                                                                                                                                       |      |           |                 |
|-------------------------------|-----------------------------------------------------------------------------------------------------------------------------------------------------------------------|------|-----------|-----------------|
| Non-pharmacological treatment | 0. NO<br>1. Yes (Ketogenic diet)<br>2. Yes (vagal nerve stimulation)<br>3. Yes (surgery)<br>4. Did you eat or drink Grapefruit and grapefruit juice while taking AED? |      |           |                 |
| Current AED                   | 0. Monotherapy<br>1. Polytherapy                                                                                                                                      |      |           |                 |
| AED                           | Name                                                                                                                                                                  | Dose | Frequency | Duration of Use |
|                               |                                                                                                                                                                       |      |           |                 |

**Table S1: Cont.**

|                                                                          |                                                                                                                                                                                                                                   |
|--------------------------------------------------------------------------|-----------------------------------------------------------------------------------------------------------------------------------------------------------------------------------------------------------------------------------|
| Drug level<br>(drug concentration<br>in blood)                           | 0. No<br>1. Yes (specify type of drug and its level)<br>a. 200 mg orally 2 times a day<br>b. 100 mg orally 4 times a day<br>c. How long the AED was taken before relapse, remission,<br>withdrawal, ongoing<br>d. Other (specify) |
| Response to first drug                                                   | 0. No<br>1. Yes                                                                                                                                                                                                                   |
| Time to remission                                                        | 0. No<br>1. seizure free immediately<br>2. seizure free within 6 months                                                                                                                                                           |
| Any relapse                                                              | 0.no<br>1. Yes (how many) and after how many days                                                                                                                                                                                 |
| Withdrawn medication                                                     | 0. no<br>1. yes                                                                                                                                                                                                                   |
| Any change on<br>epilepsy therapy                                        | 0. No<br>1. Yes (specify -----when, what, why-----<br>-----)                                                                                                                                                                      |
| Any side effects experienced<br>from epilepsy drugs                      | 0. No<br>1. Nausea and vomiting<br>2. Sedation<br>3. Ataxia<br>4. Rash<br>5. Hyponatremia<br>6. Weight gain<br>7. weight loss<br>8. Osteoporosis                                                                                  |
| Outcome evaluations<br>seizure calendar (Seizure<br>periodic evaluation) | 0. No<br>1. Yes                                                                                                                                                                                                                   |

**Table S2** The distributions of CHRM2 haplotypes in 296 epileptic patients in compare to 299 healthy controls.

| Gene  | Haplotypes | Patients (%) | Controls (%) | Odds ratio (95% CI) | P-value |
|-------|------------|--------------|--------------|---------------------|---------|
| CHRM2 | CT         | 0.4509       | 0.4902       | 1.00                | ---     |
|       | TC         | 0.4185       | 0.4041       | 1.12 (0.88 – 1.42)  | 0.34    |
|       | CC         | 0.1314       | 0.0981       | 1.41 (0.98 – 2.03)  | 0.068   |

Chi-Square Test with  $P < 0.05$  is considered significant  
Global haplotype association p-value: 0.14

**Table S3** The distributions of CHRM2 haplotypes in 172 patients with generalized epilepsy in compare to 299 healthy controls.

| Gene  | Haplotypes | Generalized           |              | Odds ratio (95% CI) | P-value |
|-------|------------|-----------------------|--------------|---------------------|---------|
|       |            | Epilepsy Patients (%) | Controls (%) |                     |         |
| CHRM2 | CT         | 0.4283                | 0.4902       | 1.00                | ---     |
|       | TC         | 0.4335                | 0.4041       | 1.23 (0.93 – 1.62)  | 0.15    |
|       | CC         | 0.1347                | 0.0981       | 1.54 (1.00 – 2.35)  | 0.05    |

Chi-Square Test with  $P < 0.05$  is considered significant  
 Global haplotype association p-value: 0.15

**Table S4** The distributions of CHRM2 haplotypes in 124 patients with partial epilepsy in compare to 299 healthy controls.

| Gene  | Haplotypes | Partial               |              | Odds ratio (95% CI) | P-value |
|-------|------------|-----------------------|--------------|---------------------|---------|
|       |            | Epilepsy Patients (%) | Controls (%) |                     |         |
| CHRM2 | CT         | 0.4283                | 0.4902       | 1.00                | ---     |
|       | TC         | 0.4335                | 0.4041       | 0.99 (0.73 – 1.35)  | 0.97    |
|       | CC         | 0.1347                | 0.0981       | 1.27 (0.80 – 2.01)  | 0.3     |

Chi-Square Test with  $P < 0.05$  is considered significant  
 Global haplotype association p-value: 0.26

**Table S5** Frequencies of CHRM2 haplotypes in 124 poor responders and 171 good responders.

| Gene  | Haplotypes | Poor responder (%) | Good responder (%) | OR (95% CI)        | P value |
|-------|------------|--------------------|--------------------|--------------------|---------|
| CHRM2 | CT         | 0.4357             | 0.4677             | 1.00               | ---     |
|       | TC         | 0.4458             | 0.3779             | 1.25 (0.88 – 1.76) | 0.21    |
|       | CC         | 0.1152             | 0.1544             | 0.83 (0.51 – 1.34) | 0.44    |

Chi-Square Test with  $P < 0.05$  is considered significant  
Global haplotype association p-value: 0.23
